# Supplementary material for: Increased Expression and Protein Divergence in Duplicate Genes Is Associated with Morphological Diversification
Source: PubMed Central journal article supplement (PMC2788128; doi:10.1371/journal.pgen.1000781), 2009-12-24

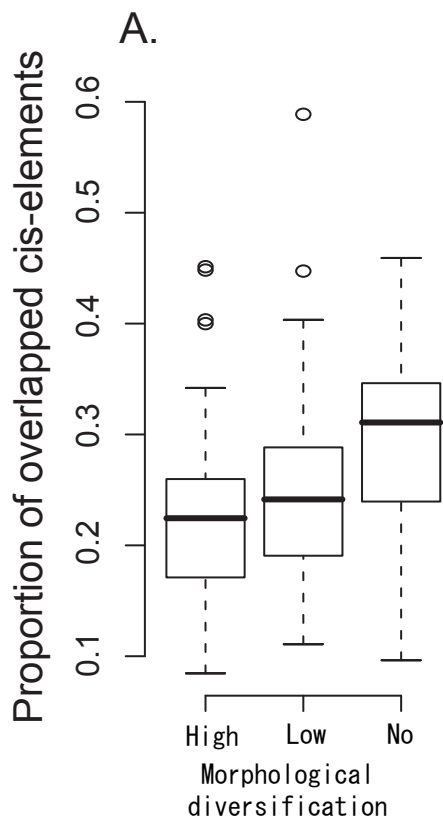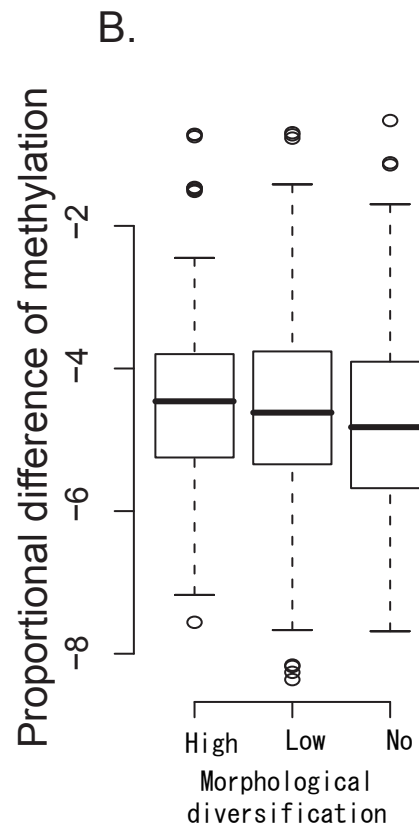

Supplement: pgen.1000781.s002.pdf [file pgen.1000781.s002.pdf]
