# Supplementary material for: Increased Expression and Protein Divergence in Duplicate Genes Is Associated with Morphological Diversification
Source: PubMed Central journal article supplement (PMC2788128; doi:10.1371/journal.pgen.1000781), 2009-12-24
Supplement: pgen.1000781.s003.pdf [file pgen.1000781.s003.pdf]

**Table S1****Paralogous gene pairs with no morphological diversification**<sup>1</sup>: This gene code is based on TAIR7 ([www.arabidopsis.org](http://www.arabidopsis.org))<sup>2</sup>:Types of phenotypic changes (no:no phenotypic effect, S:seed, V:vegetable, R:reproductive)

| Paralog A <sup>1</sup> | Paralog B <sup>1</sup> | Phenotype <sup>2</sup> throughout duple knock-out both paralog A and B |
|------------------------|------------------------|------------------------------------------------------------------------|
| AT4G22890              | AT4G11960              | V                                                                      |
| AT5G10490              | AT1G58200              | V                                                                      |
| AT4G32730              | AT5G11510              | V                                                                      |
| AT3G07780              | AT5G48160              | V                                                                      |
| AT2G23150              | AT5G67330              | V                                                                      |
| AT2G16500              | AT4G34710              | S                                                                      |
| AT5G64070              | AT5G09350              | V                                                                      |
| AT3G58780              | AT2G42830              | R                                                                      |
| AT1G75850              | AT2G17790              | V                                                                      |
| AT1G75850              | AT3G51310              | V                                                                      |
| AT2G17790              | AT3G51310              | V                                                                      |
| AT4G25700              | AT5G52570              | V                                                                      |
| AT2G16640              | AT3G16620              | V                                                                      |
| AT2G46340              | AT4G11110              | V                                                                      |
| AT2G46340              | AT3G15354              | V                                                                      |
| AT2G46340              | AT1G53090              | V                                                                      |
| AT4G11110              | AT3G15354              | V                                                                      |
| AT4G11110              | AT1G53090              | V                                                                      |
| AT3G15354              | AT1G53090              | V                                                                      |
| AT1G31340              | AT2G35635              | S                                                                      |
| AT2G37040              | AT3G53260              | R                                                                      |
| AT1G69670              | AT1G26830              | S                                                                      |
| AT1G65660              | AT4G37120              | S                                                                      |
| AT3G19450              | AT4G34230              | V                                                                      |
| AT2G46770              | AT3G61910              | R                                                                      |
| AT1G34210              | AT1G71830              | R                                                                      |
| AT5G06100              | AT3G11440              | R                                                                      |
| AT3G13730              | AT4G36380              | V                                                                      |
| AT1G74560              | AT1G18800              | V                                                                      |
| AT3G49690              | AT2G36890              | V                                                                      |
| AT1G48910              | AT1G21430              | V                                                                      |
| AT1G48910              | AT4G32540              | V                                                                      |
| AT1G48910              | AT5G11320              | V                                                                      |
| AT1G21430              | AT4G32540              | V                                                                      |
| AT1G21430              | AT5G11320              | V                                                                      |
| AT4G32540              | AT5G11320              | V                                                                      |
| AT3G27080              | AT5G40930              | V                                                                      |
| AT3G27080              | AT1G27390              | V                                                                      |
| AT5G40930              | AT1G27390              | V                                                                      |
| AT3G01650              | AT5G14420              | V                                                                      |
| AT1G67230              | AT1G13220              | V                                                                      |
| AT2G17420              | AT4G35460              | R                                                                      |
| AT4G36870              | AT2G23760              | V                                                                      |
| AT5G56280              | AT4G26430              | V                                                                      |
| AT4G19600              | AT5G45190              | S                                                                      |
| AT3G05120              | AT3G63010              | V                                                                      |
| AT3G05120              | AT5G27320              | V                                                                      |
| AT3G63010              | AT5G27320              | V                                                                      |
| AT4G14150              | AT3G23670              | R                                                                      |
| AT4G21690              | AT1G15550              | R                                                                      |
| AT1G03130              | AT4G02770              | V                                                                      |
| AT3G49670              | AT5G65700              | V                                                                      |
| AT3G49670              | AT4G20270              | V                                                                      |

|           |           |   |
|-----------|-----------|---|
| AT5G65700 | AT4G20270 | V |
| AT3G13530 | AT3G07980 | R |
| AT5G20830 | AT3G43190 | V |
| AT2G22780 | AT5G09660 | V |
| AT1G52740 | AT3G54560 | V |
| AT5G14070 | AT3G02000 | R |
| AT4G21270 | AT4G05190 | R |
| AT4G20140 | AT5G44700 | V |
| AT1G02880 | AT2G44750 | V |
| AT1G23820 | AT1G70310 | S |
| AT3G16785 | AT3G05630 | V |
| AT3G18030 | AT1G48605 | S |
| AT3G22840 | AT4G14690 | V |
| AT2G35690 | AT4G16760 | R |
| AT3G02230 | AT5G15650 | R |
| AT1G58080 | AT1G09795 | S |
| AT3G04080 | AT5G18280 | V |
| AT3G04080 | AT5G18280 | V |
| AT5G18280 | AT3G04080 | V |
| AT3G04080 | AT5G18280 | V |
| AT5G03300 | AT3G09820 | S |
| AT4G26840 | AT5G55160 | S |
| AT4G33010 | AT2G26080 | V |
| AT2G22310 | AT4G39910 | R |
| AT2G25650 | AT5G14280 | V |
| AT2G25650 | AT4G00270 | V |
| AT5G14280 | AT4G00270 | V |
| AT5G49910 | AT4G24280 | S |
| AT5G23670 | AT3G48780 | R |
| AT5G23670 | AT3G48780 | R |
| AT3G48780 | AT5G23670 | R |
| AT5G23670 | AT3G48780 | R |
| AT4G23650 | AT2G17290 | V |
| AT1G27320 | AT5G35750 | V |
| AT4G32010 | AT2G30470 | V |
| AT2G44900 | AT3G60350 | V |
| AT3G50070 | AT4G34160 | V |
| AT3G50070 | AT5G67260 | V |
| AT4G34160 | AT5G67260 | V |
| AT4G00400 | AT1G01610 | V |
| AT5G62410 | AT3G47460 | S |

## Paralogous gene pairs with low morphological diversification

<sup>1</sup>: This gene code is based on TAIR7 ([www.arabidopsis.org](http://www.arabidopsis.org))

<sup>2</sup>: Types of phenotypic changes (no:no phenotypic effect, S:seed, V:vegetable, R:reproductive)

| Paralog A <sup>1</sup> | Paralog B <sup>1</sup> | Knock-out phenotype <sup>2</sup> of<br>paralog A | Knock-out phenotype <sup>2</sup> of<br>paralog B |
|------------------------|------------------------|--------------------------------------------------|--------------------------------------------------|
| AT1G75820              | AT1G55610              | R                                                | R                                                |
| AT1G75820              | AT5G07280              | R                                                | R                                                |
| AT2G26330              | AT2G02220              | V                                                | V                                                |
| AT2G26330              | AT5G61480              | V                                                | V                                                |
| AT2G26330              | AT3G02130              | V                                                | V                                                |
| AT2G26330              | AT4G39400              | V                                                | V                                                |
| AT2G26330              | AT4G33430              | V                                                | V                                                |
| AT3G14370              | AT1G53700              | V                                                | V                                                |
| AT2G02220              | AT2G20300              | V                                                | V                                                |
| AT2G02220              | AT5G61480              | V                                                | V                                                |
| AT2G02220              | AT4G39400              | V                                                | V                                                |
| AT2G02220              | AT4G33430              | V                                                | V                                                |
| AT1G55610              | AT5G07280              | R                                                | R                                                |
| AT2G20300              | AT4G33430              | V                                                | V                                                |
| AT2G20300              | AT1G05700              | V                                                | V                                                |
| AT2G20300              | AT1G74490              | V                                                | V                                                |
| AT5G61480              | AT4G39400              | V                                                | V                                                |
| AT5G61480              | AT4G33430              | V                                                | V                                                |
| AT5G07280              | AT1G65380              | R                                                | R                                                |
| AT3G02130              | AT4G33430              | V                                                | V                                                |
| AT4G33430              | AT1G74490              | V                                                | V                                                |
| AT4G33430              | AT2G39660              | V                                                | V                                                |
| AT1G74490              | AT2G39660              | V                                                | V                                                |
| AT3G48750              | AT2G43790              | R                                                | R                                                |
| AT4G36930              | AT5G67110              | R                                                | R                                                |
| AT5G09750              | AT4G00120              | R                                                | R                                                |
| AT5G41315              | AT1G63650              | V                                                | V                                                |
| AT5G56110              | AT5G35550              | R                                                | R                                                |
| AT5G56110              | AT4G34990              | R                                                | R                                                |
| AT5G56110              | AT1G09540              | R                                                | R                                                |
| AT3G60460              | AT5G35550              | R                                                | R                                                |
| AT3G60460              | AT1G09540              | R                                                | R                                                |
| AT5G35550              | AT4G34990              | R                                                | R                                                |
| AT5G35550              | AT1G09540              | R                                                | R                                                |
| AT5G23000              | AT4G25560              | V                                                | V                                                |
| AT5G23000              | AT5G14750              | V                                                | V                                                |
| AT5G23000              | AT5G40330              | V                                                | V                                                |
| AT5G23000              | AT3G27920              | V                                                | V                                                |
| AT4G34990              | AT1G09540              | R                                                | R                                                |
| AT4G25560              | AT5G14750              | V                                                | V                                                |
| AT4G25560              | AT5G40330              | V                                                | V                                                |
| AT4G25560              | AT3G27920              | V                                                | V                                                |
| AT5G14750              | AT5G40330              | V                                                | V                                                |
| AT5G14750              | AT5G53200              | V                                                | V                                                |
| AT5G14750              | AT3G27920              | V                                                | V                                                |
| AT5G40330              | AT2G30420              | V                                                | V                                                |
| AT5G40330              | AT3G27920              | V                                                | V                                                |
| AT2G46410              | AT4G01060              | V                                                | V                                                |
| AT2G46410              | AT5G53200              | V                                                | V                                                |
| AT2G46410              | AT2G30420              | V                                                | V                                                |
| AT2G46410              | AT2G30432              | V                                                | V                                                |
| AT4G01060              | AT5G53200              | V                                                | V                                                |
| AT4G01060              | AT2G30420              | V                                                | V                                                |
| AT4G01060              | AT2G30432              | V                                                | V                                                |
| AT5G53200              | AT2G30420              | V                                                | V                                                |

|           |           |   |   |
|-----------|-----------|---|---|
| AT5G53200 | AT2G30432 | V | V |
| AT1G01280 | AT5G07990 | R | R |
| AT2G40890 | AT4G31500 | V | V |
| AT4G31500 | AT1G13710 | V | V |
| AT2G29090 | AT5G45340 | S | S |
| AT2G29090 | AT4G19230 | S | S |
| AT5G05690 | AT3G30180 | V | V |
| AT5G05690 | AT4G36380 | V | V |
| AT3G30180 | AT4G36380 | V | V |
| AT5G45340 | AT4G19230 | S | S |
| AT1G69120 | AT1G24260 | R | R |
| AT1G69120 | AT5G60910 | R | R |
| AT1G69120 | AT3G54340 | R | R |
| AT1G69120 | AT4G18960 | R | R |
| AT1G69120 | AT5G23260 | R | R |
| AT1G69120 | AT5G20240 | R | R |
| AT4G22950 | AT2G22540 | V | V |
| AT4G22950 | AT4G24540 | V | V |
| AT4G22950 | AT3G57230 | V | V |
| AT4G22950 | AT5G65050 | V | V |
| AT4G22950 | AT5G10140 | V | V |
| AT2G22540 | AT4G24540 | V | V |
| AT2G22540 | AT3G57230 | V | V |
| AT2G22540 | AT5G10140 | V | V |
| AT1G24260 | AT5G60910 | R | R |
| AT1G24260 | AT4G18960 | R | R |
| AT1G24260 | AT5G23260 | R | R |
| AT1G24260 | AT5G20240 | R | R |
| AT5G60910 | AT3G54340 | R | R |
| AT5G60910 | AT4G18960 | R | R |
| AT5G60910 | AT5G23260 | R | R |
| AT5G60910 | AT5G20240 | R | R |
| AT3G54340 | AT4G18960 | R | R |
| AT3G54340 | AT5G23260 | R | R |
| AT3G54340 | AT5G20240 | R | R |
| AT4G18960 | AT5G23260 | R | R |
| AT4G18960 | AT5G20240 | R | R |
| AT4G24540 | AT3G57230 | V | V |
| AT4G24540 | AT5G65050 | V | V |
| AT4G24540 | AT5G10140 | V | V |
| AT5G23260 | AT5G20240 | R | R |
| AT3G57230 | AT5G65050 | V | V |
| AT3G57230 | AT5G10140 | V | V |
| AT5G65050 | AT5G10140 | V | V |
| AT1G15510 | AT4G18750 | V | V |
| AT1G15510 | AT5G48910 | V | V |
| AT4G18750 | AT5G48910 | V | V |
| AT1G04820 | AT1G50010 | V | V |
| AT1G04820 | AT4G14960 | V | V |
| AT1G04820 | AT5G19770 | V | V |
| AT1G04820 | AT5G19780 | V | V |
| AT1G04820 | AT1G75780 | V | V |
| AT1G04820 | AT5G62700 | V | V |
| AT1G04820 | AT5G62690 | V | V |
| AT1G04820 | AT5G44340 | V | V |
| AT1G50010 | AT4G14960 | V | V |
| AT1G50010 | AT5G19770 | V | V |
| AT1G50010 | AT5G19780 | V | V |
| AT1G50010 | AT1G75780 | V | V |
| AT1G50010 | AT5G62700 | V | V |

|           |           |   |   |
|-----------|-----------|---|---|
| AT1G50010 | AT5G62690 | V | V |
| AT1G50010 | AT5G44340 | V | V |
| AT4G14960 | AT5G19770 | V | V |
| AT4G14960 | AT5G19780 | V | V |
| AT4G14960 | AT1G75780 | V | V |
| AT4G14960 | AT5G62700 | V | V |
| AT4G14960 | AT5G62690 | V | V |
| AT4G14960 | AT5G44340 | V | V |
| AT5G19770 | AT1G75780 | V | V |
| AT5G19770 | AT5G62700 | V | V |
| AT5G19770 | AT5G62690 | V | V |
| AT5G19770 | AT5G44340 | V | V |
| AT5G19780 | AT1G75780 | V | V |
| AT5G19780 | AT5G62700 | V | V |
| AT5G19780 | AT5G62690 | V | V |
| AT5G19780 | AT5G44340 | V | V |
| AT1G75780 | AT5G62700 | V | V |
| AT1G75780 | AT5G62690 | V | V |
| AT1G75780 | AT5G44340 | V | V |
| AT5G62700 | AT5G44340 | V | V |
| AT5G62690 | AT5G44340 | V | V |
| AT4G32410 | AT3G03050 | V | V |
| AT4G32410 | AT5G64740 | V | V |
| AT4G32410 | AT5G05170 | V | V |
| AT4G32410 | AT1G02730 | V | V |
| AT4G32410 | AT4G18780 | V | V |
| AT4G32410 | AT5G17420 | V | V |
| AT4G32410 | AT4G39350 | V | V |
| AT3G03050 | AT5G64740 | V | V |
| AT3G03050 | AT5G05170 | V | V |
| AT3G03050 | AT1G02730 | V | V |
| AT3G03050 | AT4G18780 | V | V |
| AT3G03050 | AT5G17420 | V | V |
| AT3G03050 | AT4G39350 | V | V |
| AT5G64740 | AT5G05170 | V | V |
| AT5G64740 | AT1G02730 | V | V |
| AT5G64740 | AT4G18780 | V | V |
| AT5G64740 | AT5G17420 | V | V |
| AT5G64740 | AT4G39350 | V | V |
| AT5G05170 | AT1G02730 | V | V |
| AT5G05170 | AT4G18780 | V | V |
| AT5G05170 | AT5G17420 | V | V |
| AT5G05170 | AT4G39350 | V | V |
| AT1G02730 | AT4G18780 | V | V |
| AT1G02730 | AT5G17420 | V | V |
| AT1G02730 | AT4G39350 | V | V |
| AT4G18780 | AT5G17420 | V | V |
| AT4G18780 | AT4G39350 | V | V |
| AT5G17420 | AT4G39350 | V | V |
| AT5G64580 | AT2G30950 | S | S |
| AT5G53170 | AT5G42270 | V | V |
| AT4G29040 | AT5G42270 | V | V |
| AT5G07290 | AT5G61960 | V | V |
| AT5G51810 | AT4G25420 | V | V |
| AT5G51810 | AT1G15550 | V | V |
| AT1G12980 | AT1G24590 | S | S |
| AT4G37750 | AT4G36920 | R | R |
| AT5G53950 | AT3G15170 | S | S |
| AT5G53950 | AT1G76420 | S | S |
| AT3G15170 | AT1G76420 | S | S |

|           |           |   |   |
|-----------|-----------|---|---|
| AT2G27300 | AT1G69490 | V | V |
| AT1G04250 | AT3G23050 | V | V |
| AT1G04250 | AT4G14560 | V | V |
| AT3G23050 | AT1G04240 | V | V |
| AT3G23050 | AT4G14560 | V | V |
| AT1G04240 | AT4G14560 | V | V |
| AT3G51570 | AT5G45250 | V | V |
| AT3G51570 | AT5G17880 | V | V |
| AT3G51570 | AT5G44870 | V | V |
| AT5G45250 | AT5G17880 | V | V |
| AT5G45250 | AT5G44870 | V | V |
| AT5G17880 | AT5G44870 | V | V |
| AT3G27000 | AT3G18780 | V | V |
| AT3G27000 | AT1G13180 | V | V |
| AT3G18780 | AT1G13180 | V | V |
| AT2G41940 | AT3G58070 | V | V |
| AT2G41940 | AT5G06650 | V | V |
| AT3G58070 | AT5G06650 | V | V |
| AT5G01410 | AT2G38230 | V | V |
| AT5G04130 | AT5G04110 | V | V |
| AT5G04130 | AT3G10270 | V | V |
| AT5G04110 | AT3G10270 | V | V |
| AT1G02280 | AT5G05000 | V | V |
| AT1G41830 | AT4G12420 | V | V |
| AT1G71230 | AT1G22920 | V | V |
| AT1G05470 | AT1G34120 | V | V |
| AT1G05470 | AT5G65090 | V | V |
| AT1G34120 | AT5G65090 | V | V |
| AT1G80010 | AT1G52520 | V | V |
| AT5G10510 | AT1G51190 | V | V |
| AT3G10140 | AT2G19490 | V | V |
| AT5G06170 | AT1G22710 | V | V |
| AT2G26690 | AT1G32450 | V | V |
| AT2G26690 | AT1G12110 | V | V |
| AT1G32450 | AT1G12110 | V | V |
| AT2G45190 | AT1G23420 | R | R |
| AT5G20850 | AT3G22880 | R | R |
| AT3G22880 | AT2G45280 | R | R |
| AT1G64760 | AT5G58090 | R | R |
| AT1G61720 | AT5G42800 | R | R |
| AT1G28380 | AT1G29690 | V | V |
| AT4G17730 | AT5G46860 | V | V |
| AT1G65480 | AT4G20370 | V | V |
| AT1G68050 | AT5G57360 | V | V |
| AT1G09570 | AT5G35840 | V | V |
| AT1G05580 | AT2G31910 | V | V |
| AT1G68530 | AT1G01120 | V | V |
| AT1G54490 | AT1G75660 | V | V |
| AT5G01040 | AT2G29130 | V | V |
| AT4G00730 | AT4G04890 | V | V |
| AT5G62500 | AT3G47690 | V | V |
| AT2G42890 | AT1G29400 | V | V |
| AT1G65580 | AT1G05630 | V | V |
| AT1G01420 | AT4G01070 | V | V |
| AT4G18370 | AT5G39830 | V | V |
| AT1G17840 | AT1G51500 | V | V |
| AT5G57050 | AT4G26080 | V | V |
| AT5G66570 | AT3G50820 | V | V |
| AT5G16050 | AT2G42590 | V | V |
| AT1G15820 | AT1G19150 | V | V |

## Paralogous gene pairs with high morphological diversification

<sup>1</sup>: This gene code is based on TAIR7 ([www.arabidopsis.org](http://www.arabidopsis.org))

<sup>2</sup>: Types of phenotypic changes (no: no phenotypic effect, S: seed, V: vegetable, R: reproductive)

| Paralog A <sup>1</sup> | Paralog B <sup>1</sup> | Knock-out phenotype <sup>2</sup> of<br>paralog A | Knock-out phenotype <sup>2</sup> of<br>paralog B |
|------------------------|------------------------|--------------------------------------------------|--------------------------------------------------|
| AT1G75820              | AT2G26330              | R                                                | V                                                |
| AT1G75820              | AT2G02220              | R                                                | V                                                |
| AT1G75820              | AT3G19700              | R                                                | S                                                |
| AT1G75820              | AT5G61480              | R                                                | V                                                |
| AT1G75820              | AT4G39400              | R                                                | V                                                |
| AT1G75820              | AT4G33430              | R                                                | V                                                |
| AT2G26330              | AT1G55610              | V                                                | R                                                |
| AT2G26330              | AT3G19700              | V                                                | S                                                |
| AT2G26330              | AT5G07280              | V                                                | R                                                |
| AT3G14370              | AT2G34650              | V                                                | S                                                |
| AT1G63700              | AT4G08500              | S                                                | V                                                |
| AT2G02220              | AT1G55610              | V                                                | R                                                |
| AT2G02220              | AT5G07280              | V                                                | R                                                |
| AT1G55610              | AT3G19700              | R                                                | S                                                |
| AT1G55610              | AT5G61480              | R                                                | V                                                |
| AT1G55610              | AT3G02130              | R                                                | V                                                |
| AT1G55610              | AT4G39400              | R                                                | V                                                |
| AT3G19700              | AT5G61480              | S                                                | V                                                |
| AT3G19700              | AT5G07280              | S                                                | R                                                |
| AT3G19700              | AT4G33430              | S                                                | V                                                |
| AT4G05200              | AT1G74490              | R                                                | V                                                |
| AT4G05200              | AT2G39660              | R                                                | V                                                |
| AT5G61480              | AT5G07280              | V                                                | R                                                |
| AT5G07280              | AT3G02130              | R                                                | V                                                |
| AT5G07280              | AT4G39400              | R                                                | V                                                |
| AT4G33430              | AT3G51550              | V                                                | R                                                |
| AT5G54380              | AT3G51550              | V                                                | R                                                |
| AT3G48750              | AT5G63610              | R                                                | V                                                |
| AT3G48750              | AT4G18710              | R                                                | V                                                |
| AT2G43790              | AT5G63610              | R                                                | V                                                |
| AT2G43790              | AT4G18710              | R                                                | V                                                |
| AT1G53700              | AT2G34650              | V                                                | S                                                |
| AT4G36930              | AT1G09530              | R                                                | V                                                |
| AT5G41315              | AT4G09820              | V                                                | R                                                |
| AT2G46970              | AT5G67110              | V                                                | R                                                |
| AT5G67110              | AT5G61270              | R                                                | V                                                |
| AT1G63650              | AT4G09820              | V                                                | R                                                |
| AT5G56110              | AT5G23000              | R                                                | V                                                |
| AT5G56110              | AT4G25560              | R                                                | V                                                |
| AT5G56110              | AT5G14750              | R                                                | V                                                |
| AT5G56110              | AT5G40330              | R                                                | V                                                |
| AT5G56110              | AT3G27920              | R                                                | V                                                |
| AT3G60460              | AT4G25560              | R                                                | V                                                |
| AT3G60460              | AT5G14750              | R                                                | V                                                |
| AT3G60460              | AT5G40330              | R                                                | V                                                |
| AT3G60460              | AT3G27920              | R                                                | V                                                |
| AT5G35550              | AT5G23000              | R                                                | V                                                |
| AT5G35550              | AT4G25560              | R                                                | V                                                |
| AT5G35550              | AT5G14750              | R                                                | V                                                |
| AT5G35550              | AT5G40330              | R                                                | V                                                |
| AT5G35550              | AT3G27920              | R                                                | V                                                |
| AT5G23000              | AT4G34990              | V                                                | R                                                |
| AT5G23000              | AT1G09540              | V                                                | R                                                |
| AT4G34990              | AT4G25560              | R                                                | V                                                |

|           |           |   |   |
|-----------|-----------|---|---|
| AT4G34990 | AT5G14750 | R | V |
| AT4G34990 | AT5G40330 | R | V |
| AT4G34990 | AT3G27920 | R | V |
| AT4G25560 | AT1G09540 | V | R |
| AT5G14750 | AT1G09540 | V | R |
| AT1G09540 | AT5G40330 | R | V |
| AT1G09540 | AT3G27920 | R | V |
| AT4G36260 | AT3G51060 | V | R |
| AT1G01280 | AT2G40890 | R | V |
| AT5G07990 | AT2G40890 | R | V |
| AT5G07990 | AT4G31500 | R | V |
| AT5G07990 | AT1G13710 | R | V |
| AT2G29090 | AT5G05690 | S | V |
| AT2G29090 | AT4G36380 | S | V |
| AT5G05690 | AT5G45340 | V | S |
| AT5G05690 | AT4G19230 | V | S |
| AT3G30180 | AT5G45340 | V | S |
| AT3G30180 | AT4G19230 | V | S |
| AT5G45340 | AT4G36380 | S | V |
| AT4G36380 | AT4G19230 | V | S |
| AT1G69120 | AT4G22950 | R | V |
| AT1G69120 | AT2G22540 | R | V |
| AT1G69120 | AT4G24540 | R | V |
| AT1G69120 | AT3G57230 | R | V |
| AT1G69120 | AT5G65050 | R | V |
| AT1G69120 | AT5G10140 | R | V |
| AT4G22950 | AT1G24260 | V | R |
| AT4G22950 | AT5G60910 | V | R |
| AT4G22950 | AT4G18960 | V | R |
| AT4G22950 | AT5G23260 | V | R |
| AT2G22540 | AT1G24260 | V | R |
| AT2G22540 | AT3G54340 | V | R |
| AT2G22540 | AT4G18960 | V | R |
| AT2G22540 | AT5G23260 | V | R |
| AT2G22540 | AT5G20240 | V | R |
| AT1G24260 | AT4G24540 | R | V |
| AT1G24260 | AT3G57230 | R | V |
| AT1G24260 | AT5G65050 | R | V |
| AT1G24260 | AT5G10140 | R | V |
| AT5G60910 | AT4G24540 | R | V |
| AT5G60910 | AT3G57230 | R | V |
| AT5G60910 | AT5G65050 | R | V |
| AT5G60910 | AT5G10140 | R | V |
| AT3G54340 | AT4G24540 | R | V |
| AT3G54340 | AT5G10140 | R | V |
| AT4G18960 | AT4G24540 | R | V |
| AT4G18960 | AT3G57230 | R | V |
| AT4G18960 | AT5G65050 | R | V |
| AT4G18960 | AT5G10140 | R | V |
| AT4G24540 | AT5G23260 | V | R |
| AT4G24540 | AT5G20240 | V | R |
| AT5G23260 | AT3G57230 | R | V |
| AT5G23260 | AT5G65050 | R | V |
| AT5G23260 | AT5G10140 | R | V |
| AT3G57230 | AT5G20240 | V | R |
| AT5G20240 | AT5G10140 | R | V |
| AT1G08070 | AT1G15510 | S | V |
| AT1G08070 | AT4G18750 | S | V |
| AT1G08070 | AT5G48910 | S | V |



|           |           |   |   |
|-----------|-----------|---|---|
| AT1G08070 | AT5G40410 | S | R |
| AT1G15510 | AT5G40410 | V | R |
| AT4G18750 | AT5G40410 | V | R |
| AT5G48910 | AT5G40410 | V | R |
| AT4G32410 | AT4G38190 | V | S |
| AT3G03050 | AT4G38190 | V | S |
| AT5G64740 | AT4G38190 | V | S |
| AT5G05170 | AT4G38190 | V | S |
| AT1G02730 | AT4G38190 | V | S |
| AT4G38190 | AT4G18780 | S | V |
| AT4G38190 | AT5G17420 | S | V |
| AT4G38190 | AT4G39350 | S | V |
| AT5G64580 | AT5G42270 | S | V |
| AT5G53170 | AT2G30950 | V | S |
| AT2G30950 | AT5G42270 | S | V |
| AT5G51810 | AT3G51240 | V | R |
| AT4G25420 | AT3G51240 | V | R |
| AT1G15550 | AT3G51240 | V | R |
| AT1G15750 | AT3G16830 | S | V |
| AT5G53950 | AT1G69490 | S | V |
| AT3G15170 | AT2G27300 | S | V |
| AT3G15170 | AT1G69490 | S | V |
| AT1G76420 | AT1G69490 | S | V |
| AT1G04250 | AT1G04550 | V | S |
| AT3G23050 | AT1G04550 | V | S |
| AT1G04240 | AT1G04550 | V | S |
| AT4G14560 | AT1G04550 | V | S |
| AT3G60830 | AT3G18780 | S | V |
| AT3G27000 | AT1G18450 | V | R |
| AT1G18450 | AT3G18780 | R | V |
| AT1G18450 | AT1G13180 | R | V |
| AT2G41940 | AT5G14010 | V | R |
| AT5G14010 | AT3G58070 | R | V |
| AT1G19850 | AT5G20730 | S | V |
| AT1G19850 | AT5G37020 | S | R |
| AT5G20730 | AT5G37020 | V | R |
| AT5G06170 | AT1G71890 | V | S |
| AT1G71890 | AT1G22710 | S | V |
| AT1G61720 | AT1G15950 | R | V |
| AT5G42800 | AT1G15950 | R | V |
| AT4G17730 | AT5G16830 | V | R |
| AT5G46860 | AT5G16830 | V | R |
| AT1G65480 | AT5G03840 | V | R |
| AT4G20370 | AT5G03840 | V | R |
| AT5G57090 | AT1G73590 | V | R |
| AT3G06860 | AT4G29010 | V | R |
| AT2G40220 | AT3G60490 | S | V |
| AT2G01420 | AT1G70940 | S | V |
| AT1G17260 | AT3G47950 | R | V |
| AT4G00220 | AT1G65620 | S | V |
