# Supplementary material for: Increased Expression and Protein Divergence in Duplicate Genes Is Associated with Morphological Diversification
Source: PubMed Central journal article supplement (PMC2788128; doi:10.1371/journal.pgen.1000781), 2009-12-24
Supplement: pgen.1000781.s004.pdf [file pgen.1000781.s004.pdf]

**Table S2**

**Statistical difference (P. values) between every pair in random paralogous group and no, low and high morphological diversification groups in the wilcoxon test.**

In Figure S1-A

|        | No | Low                    | High                    | Random                  |
|--------|----|------------------------|-------------------------|-------------------------|
| No     |    | $3.1 \times 10^{-4} *$ | $2.2 \times 10^{-16} *$ | $2.7 \times 10^{-4} *$  |
| Low    |    |                        | $7.2 \times 10^{-9} *$  | 0.20                    |
| High   |    |                        |                         | $2.2 \times 10^{-16} *$ |
| Random |    |                        |                         |                         |

\* Significant difference at P=0.01.

In Figure S1-B

|        | No | Low                     | High                    | Random                  |
|--------|----|-------------------------|-------------------------|-------------------------|
| No     |    | $3.0 \times 10^{-16} *$ | $3.5 \times 10^{-25} *$ | 0.49                    |
| Low    |    |                         | $1.1 \times 10^{-5} *$  | $1.7 \times 10^{-37} *$ |
| High   |    |                         |                         | $7.0 \times 10^{-49} *$ |
| Random |    |                         |                         |                         |

\* Significant difference at P=0.01.

In Figure S1-C

|        | No | Low                     | High                    | Random                  |
|--------|----|-------------------------|-------------------------|-------------------------|
| No     |    | $3.0 \times 10^{-18} *$ | $3.9 \times 10^{-33} *$ | $5.6 \times 10^{-3} *$  |
| Low    |    |                         | $2.8 \times 10^{-13} *$ | $3.8 \times 10^{-34} *$ |
| High   |    |                         |                         | $3.3 \times 10^{-63} *$ |
| Random |    |                         |                         |                         |

\* Significant difference at P=0.01.

In Figure 2-A

|        | No | Low                    | High                    | Random                  |
|--------|----|------------------------|-------------------------|-------------------------|
| No     |    | $4.7 \times 10^{-7} *$ | $1.5 \times 10^{-16} *$ | $7.0 \times 10^{-4} *$  |
| Low    |    |                        | $9.7 \times 10^{-9} *$  | $4.8 \times 10^{-4} *$  |
| High   |    |                        |                         | $2.4 \times 10^{-22} *$ |
| Random |    |                        |                         |                         |

\* Significant difference at P=0.01.

In Figure 2-B

|        | No | Low                    | High                    | Random                  |
|--------|----|------------------------|-------------------------|-------------------------|
| No     |    | $1.2 \times 10^{-9} *$ | $2.7 \times 10^{-19} *$ | $5.4 \times 10^{-7} *$  |
| Low    |    |                        | $3.9 \times 10^{-5} *$  | $3.0 \times 10^{-3} *$  |
| High   |    |                        |                         | $1.1 \times 10^{-13} *$ |
| Random |    |                        |                         |                         |

\* Significant difference at P=0.01.

In Figure 2-C

|        | No | Low  | High | Random |
|--------|----|------|------|--------|
| No     |    | 0.06 | 0.09 | 0.11   |
| Low    |    |      | 0.87 | 0.61   |
| High   |    |      |      | 0.83   |
| Random |    |      |      |        |

\* Significant difference at P=0.01.

In Figure S2-A

|     | No | Low                    | High                   |
|-----|----|------------------------|------------------------|
| No  |    | $3.3 \times 10^{-6} *$ | $3.3 \times 10^{-9} *$ |
| Low |    |                        | 0.02 *                 |

\* Significant difference at P=0.05.

In Figure S2-B

|     | No | Low  | High |
|-----|----|------|------|
| No  |    | 0.34 | 0.20 |
| Low |    |      | 0.62 |

\* Significant difference at P=0.05.
