# Supplementary material for: Increased Expression and Protein Divergence in Duplicate Genes Is Associated with Morphological Diversification
Source: PubMed Central journal article supplement (PMC2788128; doi:10.1371/journal.pgen.1000781), 2009-12-24
Supplement: pgen.1000781.s005.pdf [file pgen.1000781.s005.pdf]

**Table S3**

| <b>Morphological diversification</b> | <b>Protein</b> | <b>Expression</b>     |                       | <b>P-values<sup>c</sup></b> |
|--------------------------------------|----------------|-----------------------|-----------------------|-----------------------------|
|                                      |                | <b>Divergent</b>      | <b>Not divergent</b>  |                             |
| High                                 | Divergent      | 44                    | 35 (55%) <sup>b</sup> | 0.45                        |
|                                      | Not divergent  | 29 (45%) <sup>a</sup> | 35                    |                             |
| Low                                  | Divergent      | 17                    | 50 (64%) <sup>b</sup> | 0.004                       |
|                                      | Not divergent  | 28 (36%) <sup>a</sup> | 82                    |                             |
| Either high or low                   | Divergent      | 61                    | 85 (63%) <sup>b</sup> | 0.02                        |
|                                      | Not divergent  | 57 (37%) <sup>a</sup> | 117                   |                             |

<sup>a</sup> Proportion of paralogous gene pairs with a higher expression divergence but no protein divergence

<sup>b</sup> Proportion of paralogous gene pairs with a higher protein divergence but no expression divergence

<sup>c</sup> Null hypothesis is that proportion of paralogous gene pairs with a higher expression divergence is the same proportion of paralogous gene pairs with a higher protein divergence.
